# Supplementary material
Source: publisher figshare collection journal article supplement (https://karger.figshare.com/articles/dataset/_/13273154)
Supplement: Supplementary file 2 [file 1]

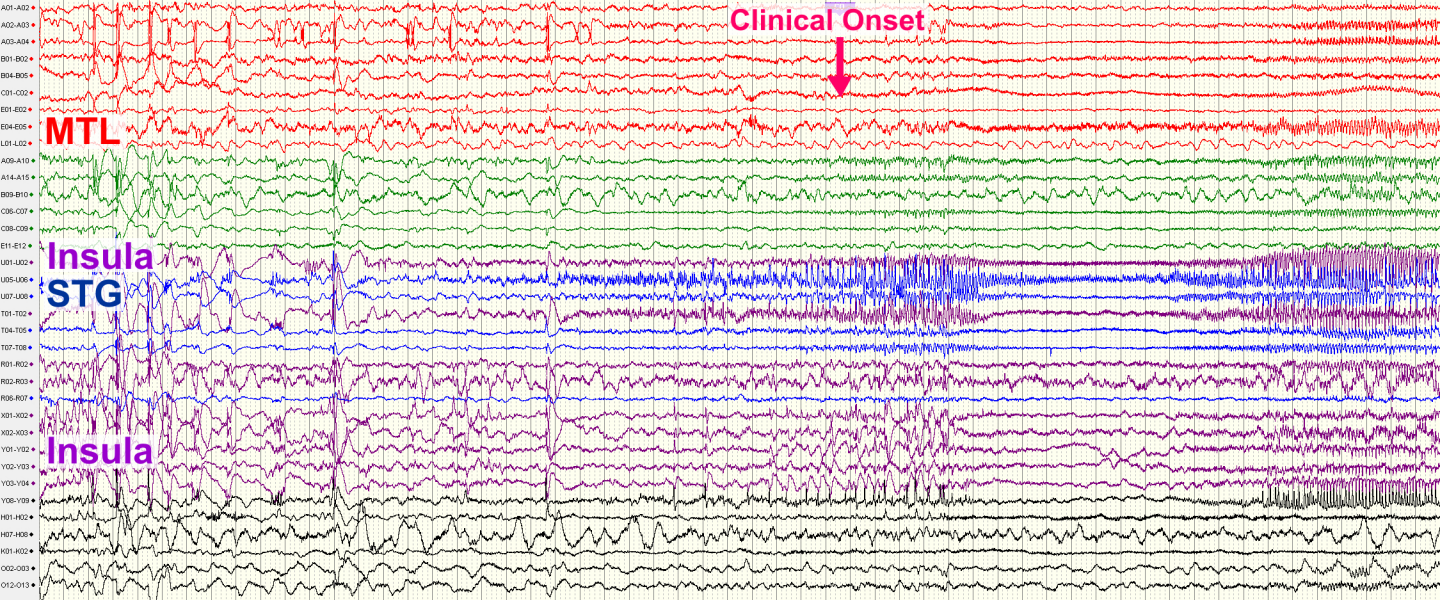

Supplementary Figure S2: SEEG recording of a habitual seizure showing electrical onset with low-voltage fast activity in the superior temporal gyrus (STG- blue), with rapid propagation to the insula (purple), and subsequently to the medial temporal lobe (MTL – red)
